# Supplementary material for: Gastroprotective effects of Pediococcus acidilactici GKA4 and Lactobacillus brevis GKL93 against ethanol-induced gastric ulcers via regulation of the immune response and gut microbiota in mice
Source: Royal Society of Chemistry journal article supplement (doi:10.1039/d4fo04106b), 2024-01-01

### Supplementary information

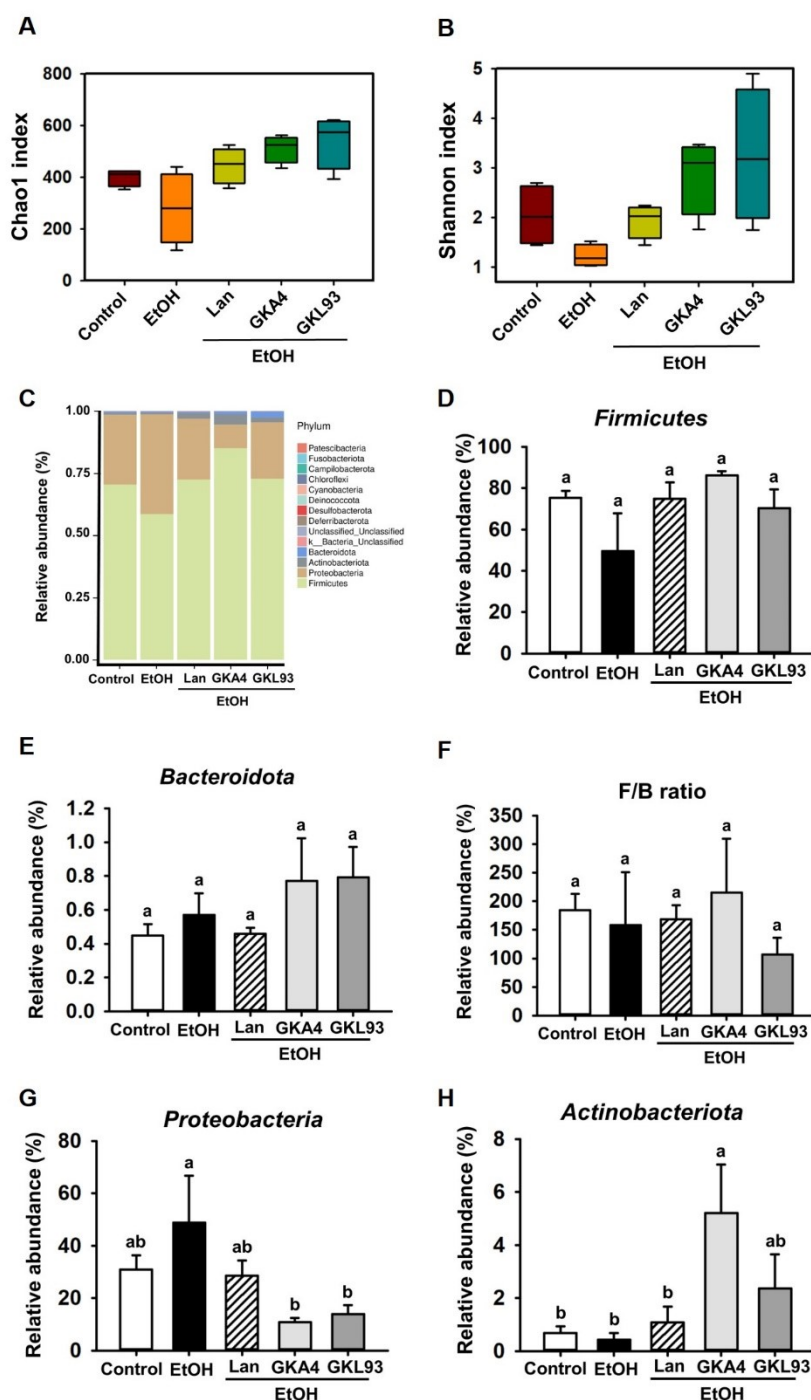

**Supplementary Figure 1.** Effect of GKA4 and GKL93 predministration on gut microbiota at the phylum level in BALB/c mice subjected to ethanol-induced gastric damage. (A) Chao1 index. (B) Shannon index. (C) The microbiota composition at the phylum level. (D-H) At the family level, the relative abundances of *Firmicutes*, *Bacteroidota*, the F/B ratio, *Proteobacteria*, and *Actinobacteriota*. Values with different letters (a, b, and c) indicate statistically significant differences ( $p < 0.05$ ).

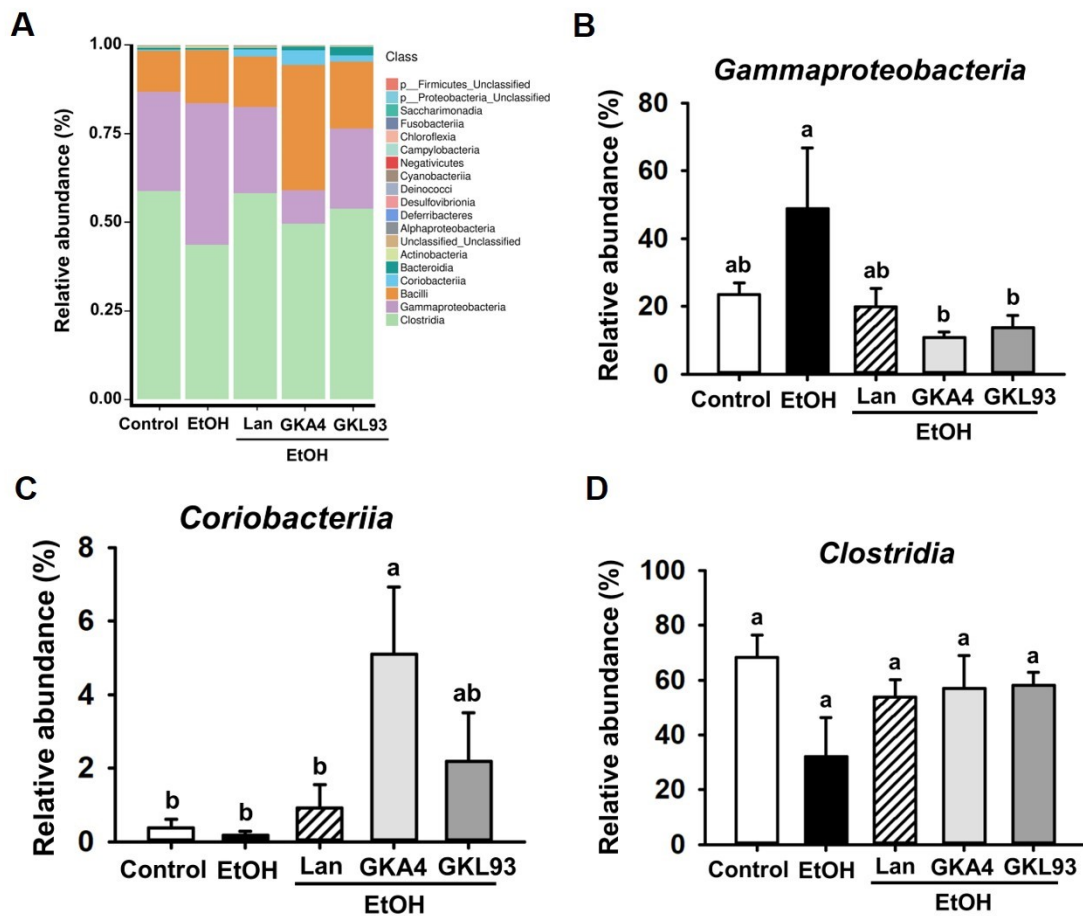

**Supplementary Figure 2.** Effects of GKA4 and GKL93 preadministration on the gut microbiota at the class level in BALB/c mice subjected to ethanol-induced gastric damage. (A) The microbiota composition at the class level. (B-D) The relative abundances of *Gammaproteobacteria*, *Coriobacteriia*, and *Clostridia* at the class level. Values with different letters (a, b, and c) indicate statistically significant differences ( $p < 0.05$ ).

## Raw images of the Western blot data

### Nrf2 and the corresponding $\beta$ -actin (5 replicates)

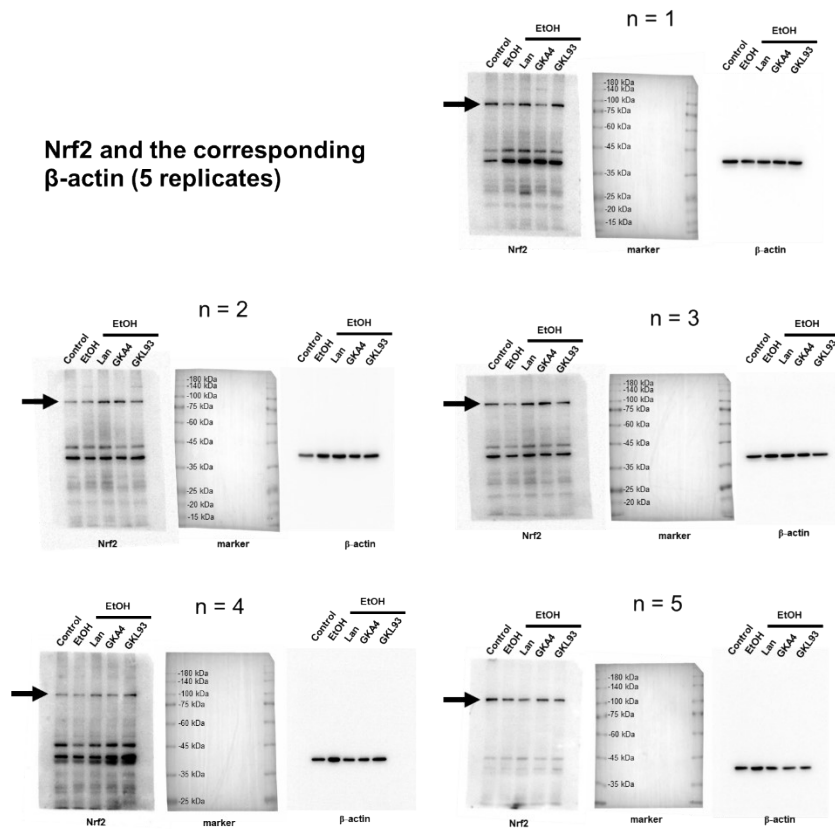

### p-IkBa and the corresponding $\beta$ -actin (5 replicates)

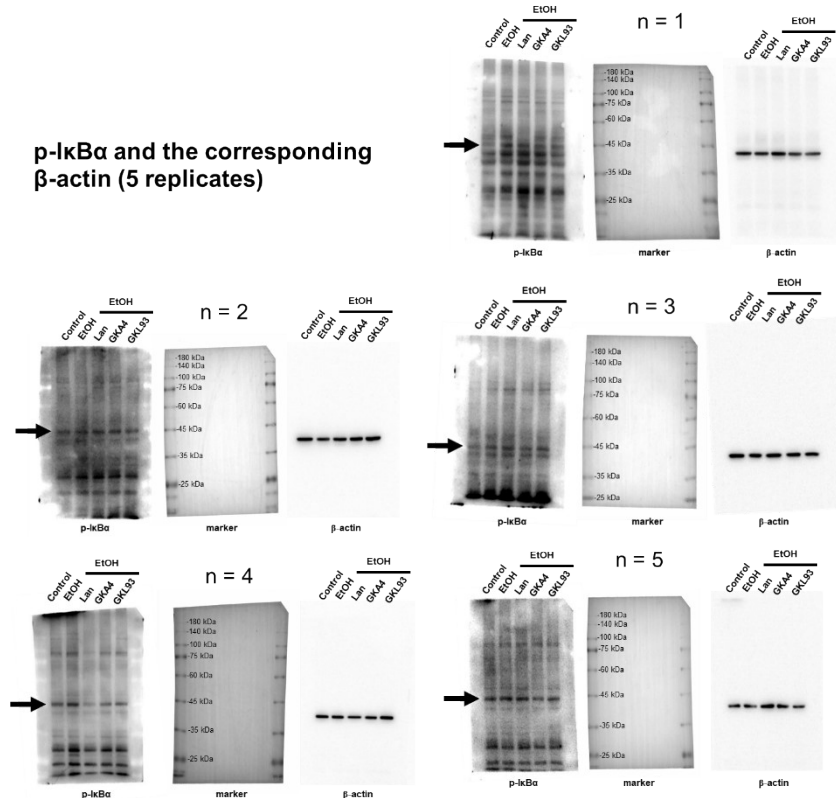

**IκBα and the corresponding β-actin (5 replicates)**

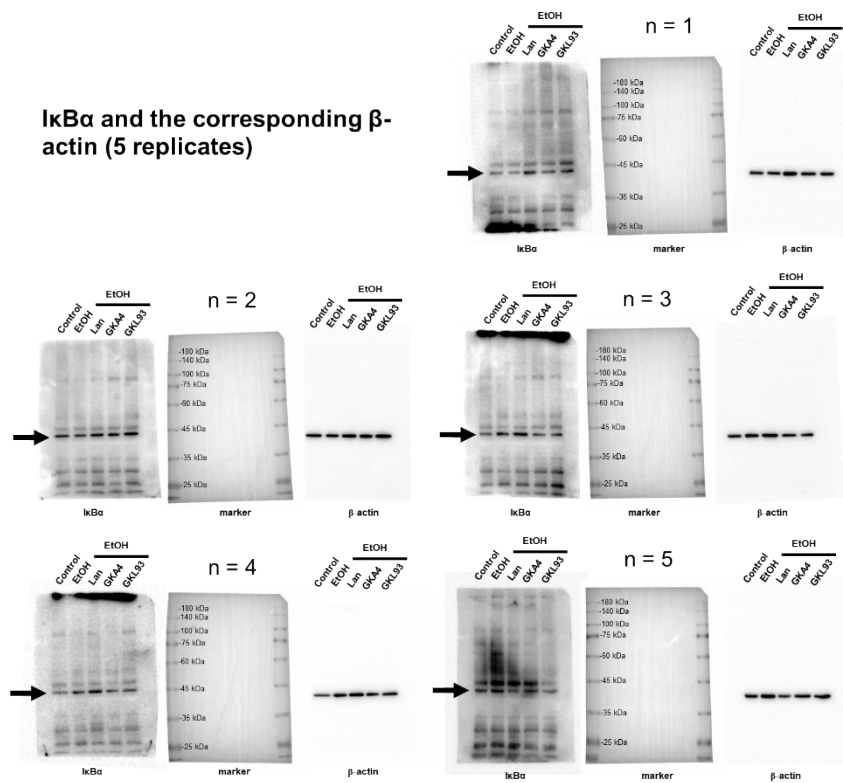

**p-P65 and the corresponding β-actin (5 replicates)**

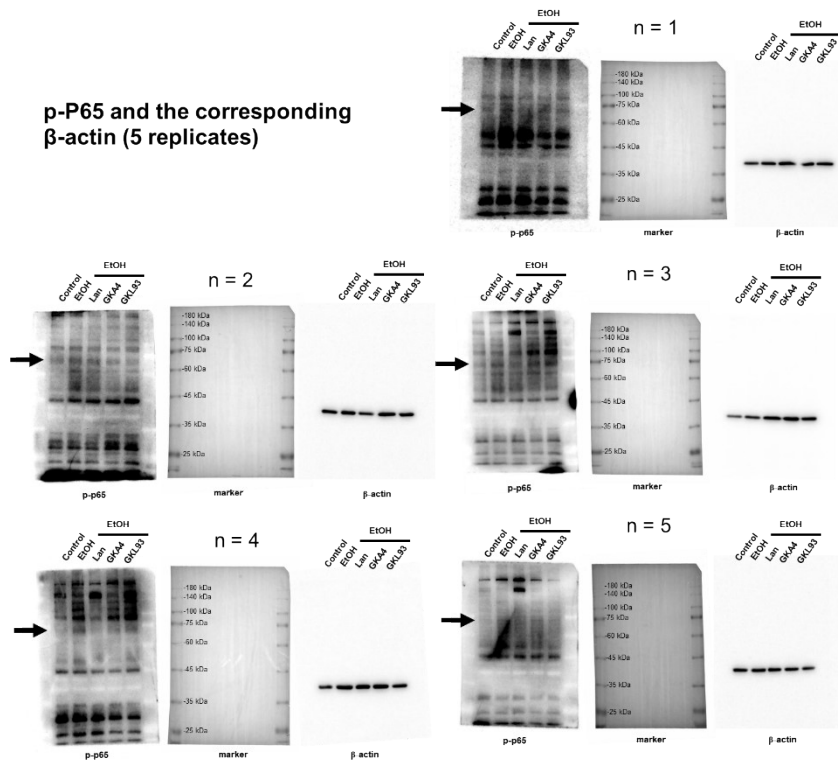

## P65 and the corresponding $\beta$ -actin (5 replicates)

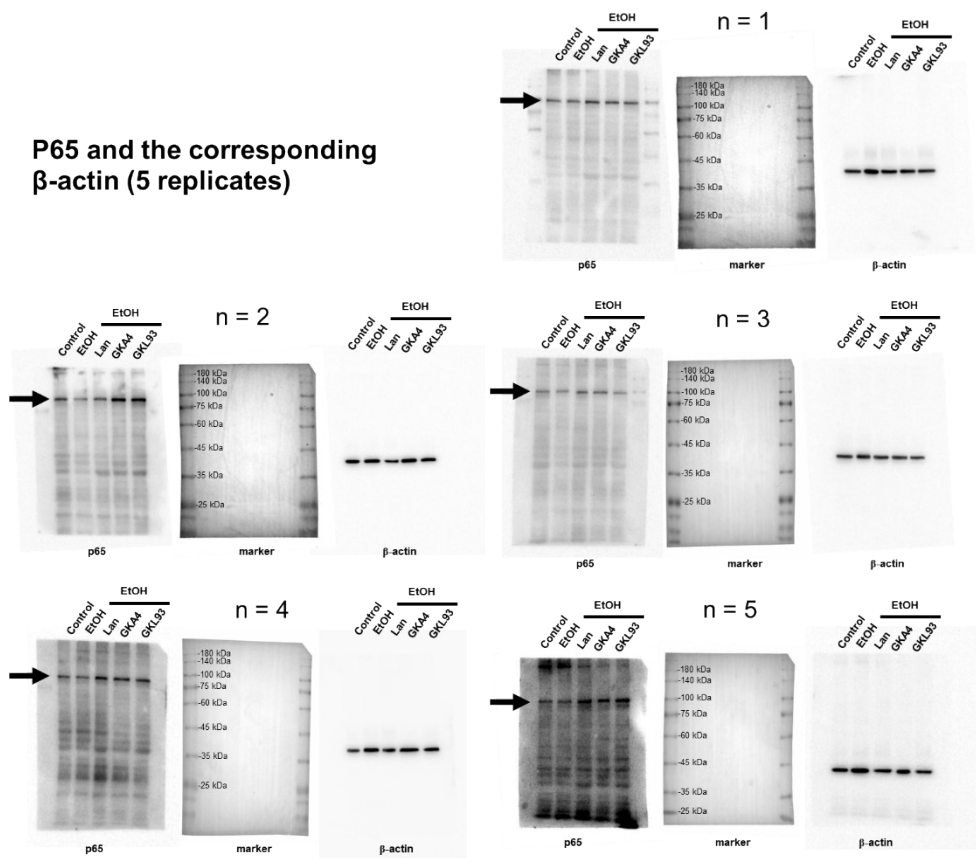

Supplement: d4fo04106b1.pdf [file d4fo04106b1.pdf]
